# Supplementary material
Source: MDPI journal article supplement (https://www.mdpi.com/2076-3417/12/15/7771)
Supplement: s1 [file s1]

**Table S1:** Questionnaire of Experimental Use of the Disinfection Chamber.

| IDENTIFICATION OF THE HEALTHCARE UNIT |  |
|---------------------------------------|--|
| Name of the healthcare unit:          |  |
| City:                                 |  |

  

| PARTICIPANT IDENTIFICATION |                               |
|----------------------------|-------------------------------|
| Name:                      |                               |
| Sex:                       |                               |
| (   ) Male (   ) Female    |                               |
| Occupation:                |                               |
| (   ) Physician            | (   ) Nursing Technician      |
| (   ) Nurse                | (   ) Nutritionist            |
| (   ) Pharmacist           | (   ) Others, please specify: |
| (   ) Physiotherapist      | _____                         |

  

| HISTORY OF CONTACT                                                                                                                                                    |                                                                                                                                            |
|-----------------------------------------------------------------------------------------------------------------------------------------------------------------------|--------------------------------------------------------------------------------------------------------------------------------------------|
| Do you use sodium hypochlorite (sanitary water) for surface cleaning/disinfection in your home?                                                                       | (   ) Yes (   ) No                                                                                                                         |
| If the response was "yes" to the previous question, do you take any precautions while handling sodium hypochlorite?<br><br>Please indicate next to the measures used. | (   ) None<br>(   ) I worry about dilution<br>(   ) I use gloves when handling the sodium hypochlorite<br>(   ) Others: _____<br><br>_____ |
| Have you had any reaction to sodium hypochlorite in previous contact?                                                                                                 | (   ) Yes (   ) No                                                                                                                         |
| If yes to the previous question, indicate the type(s) of reaction(s).                                                                                                 | (   ) Irritation or itching of the skin<br>(   ) Irritation or itching in the eyes<br>(   ) Difficulty breathing<br>(   ) Others: _____    |

|                                                                                                                                                                                                     |                                        |
|-----------------------------------------------------------------------------------------------------------------------------------------------------------------------------------------------------|----------------------------------------|
| Do you consider sodium hypochlorite to be a good disinfectant?                                                                                                                                      | (    ) Yes (    ) No (    ) I not know |
| Did you know that sodium hypochlorite (0.1% to 0.5%) is effective for the inactivation of the new coronavirus and is recommended by the WHO for the disinfection of home and hospital environments? | (    ) Yes (    ) No                   |
| Did you know that the disinfectant solution used in the chamber for PPE disinfection is sodium hypochlorite solution?                                                                               | (    ) Yes (    ) No                   |

| USE OF THE DISINFECTION CHAMBER                                                                                                         |                                                                                                                                                                                                                                                                                                  |
|-----------------------------------------------------------------------------------------------------------------------------------------|--------------------------------------------------------------------------------------------------------------------------------------------------------------------------------------------------------------------------------------------------------------------------------------------------|
| Did you experience any discomfort when using the disinfection chamber?                                                                  | (    ) Yes (    ) No                                                                                                                                                                                                                                                                             |
| If yes to the previous question, please indicate the type of discomfort(s) you felt.                                                    | <input type="checkbox"/> Claustrophobia<br><input type="checkbox"/> Dizziness<br><input type="checkbox"/> Difficulty breathing <input type="checkbox"/> Skin irritation<br><input type="checkbox"/> Headache <input type="checkbox"/> Irritation in the eyes<br><input type="checkbox"/> Others: |
| If your response was "YES" to the previous question, please specify the degree of irritation.                                           | <input type="checkbox"/> Mild<br><input type="checkbox"/> Moderate<br><input type="checkbox"/> Severe                                                                                                                                                                                            |
| Did you know that the chamber was developed to reduce the microbial load, including that of the new coronavirus, on the surface of PPE? | (    ) Yes (    ) No                                                                                                                                                                                                                                                                             |
| Do you consider the use of the disinfection chamber before the PPE doffing process as a safe option?                                    | (    ) Yes (    ) No (    ) Do not know                                                                                                                                                                                                                                                          |
| Did you notice whether all PPE were uniformly humidified after using the chamber?                                                       | (    ) Yes (    ) No (    ) Do not know                                                                                                                                                                                                                                                          |

|                                                                                                                                   |                                         |
|-----------------------------------------------------------------------------------------------------------------------------------|-----------------------------------------|
| <b>Do you consider the disinfection chamber to be effective as an additional protective barrier for healthcare professionals?</b> | (    ) Yes (    ) No (    ) Do not know |
| <b>Do you consider that the use of the disinfection chamber can lead to a false sense of security?</b>                            | (    ) Yes (    ) No (    ) Do not know |
| <b>Did you know that even with the use of the chamber all the procedures for the doffing of PPEs must be strictly followed?</b>   | (    ) Yes (    ) No                    |
| <b>After using the chamber, have you followed all the appropriate PPE doffing procedures?</b>                                     | (    ) Yes (    ) No (    ) Do not know |

**Table S2:** Absolute and relative frequency of responses to survey questions evaluated in this study according to the hospital or healthcare unit (values in percentages (%) are presented in brackets).

| Survey Question                                                                                                           | Alternatives (Answers)                                | Hospital Arena<br>Fonte Nova | Hospital Ernesto<br>Simões | Hospital Espanhol |
|---------------------------------------------------------------------------------------------------------------------------|-------------------------------------------------------|------------------------------|----------------------------|-------------------|
|                                                                                                                           |                                                       |                              |                            |                   |
| Total number of participants                                                                                              | -                                                     | 98                           | 73                         | 74                |
| Sex                                                                                                                       | Female                                                | 68 (69.39)                   | 56 (76.71)                 | 50 (67.57)        |
|                                                                                                                           | Male                                                  | 30 (30.61)                   | 17 (23.29)                 | 24 (32.43)        |
| Occupation                                                                                                                | Physician                                             | 8 (8.16)                     | 4 (5.48)                   | 4 (5.41)          |
|                                                                                                                           | Nurse                                                 | 13 (13.27)                   | 8 (10.96)                  | 11 (14.86)        |
|                                                                                                                           | Pharmacist                                            | 2 (2.04)                     | 0 (0.00)                   | 1 (1.35)          |
|                                                                                                                           | Physiotherapist                                       | 16 (16.33)                   | 5 (6.85)                   | 1 (1.35)          |
|                                                                                                                           | Nursing Technician                                    | 30 (30.31)                   | 38 (52.05)                 | 22 (29.73)        |
|                                                                                                                           | Nutritionist                                          | 3 (3.06)                     | 0 (0.00)                   | 5 (6.76)          |
|                                                                                                                           | Psychologist                                          | 2 (2.04)                     | 0 (0.00)                   | 1 (1.35)          |
|                                                                                                                           | Administrative Assistant/<br>Hygienists               | 7 (7.14)                     | 4 (5.48)                   | 14 (18.92)        |
|                                                                                                                           | Receptionist                                          | 0 (0.00)                     | 0 (0.00)                   | 1 (1.35)          |
|                                                                                                                           | Biomedical                                            | 0 (0.00)                     | 0 (0.00)                   | 2 (2.70)          |
|                                                                                                                           | Engineer                                              | 2 (2.04)                     | 0 (0.00)                   | 2 (2.70)          |
|                                                                                                                           | General Services (Staff)                              | 0 (0.00)                     | 0 (0.00)                   | 4 (5.41)          |
|                                                                                                                           | Social Worker                                         | 1 (1.02)                     | 0 (0.00)                   | 0 (0.00)          |
|                                                                                                                           | Rescuer                                               | 0 (0.00)                     | 0 (0.00)                   | 0 (0.00)          |
|                                                                                                                           | Others                                                | 14 (14.29)                   | 14 (19.98)                 | 0 (0.00)          |
| Do you use sodium hypochlorite (sanitary water) for<br>surface cleaning/disinfection in your home?                        | Yes                                                   | 83 (84.69)                   | 70 (95.89)                 | 72 (97.30)        |
|                                                                                                                           | No                                                    | 15 (15.31)                   | 3 (4.11)                   | 2 (2.70)          |
| If the response was “yes” to the previous question,<br>do you take any precautions while handling sodium<br>hypochlorite? | None                                                  | 19 (19.39) (20.43)           | 10 (13.16)                 | 12 (14.81)        |
|                                                                                                                           | I worry about dilution                                | 46 (46.94) (49.46)           | 36 (47.37)                 | 42 (51.85)        |
|                                                                                                                           | I use gloves when handling the sodium<br>hypochlorite | 28 (28.57) (30.11)           | 28 (36.84)                 | 26 (32.01)        |

|                                                                                                                                                                                                     |                                   |                    |            |            |
|-----------------------------------------------------------------------------------------------------------------------------------------------------------------------------------------------------|-----------------------------------|--------------------|------------|------------|
|                                                                                                                                                                                                     | Others                            | 0 (0.00)           | 2 (2.63)   | 1 (1.23)   |
| Have you had any reaction to sodium hypochlorite in previous contact?                                                                                                                               | Yes                               | 13 (13.27)         | 22 (30.14) | 15 (20.27) |
|                                                                                                                                                                                                     | No                                | 85 (86.73)         | 51 (69.86) | 59 (79.73) |
| If yes to the previous question, indicate the type(s) of reaction(s).                                                                                                                               | Irritation or itching of the skin | 8 (38.10)          | 11 (32.35) | 7 (36.84)  |
|                                                                                                                                                                                                     | Irritation or itching in the eyes | 6 (28.57)          | 13 (38.24) | 8 (42.11)  |
|                                                                                                                                                                                                     | Difficulty breathing              | 6 (28.57)          | 10 (29.41) | 3 (15.79)  |
|                                                                                                                                                                                                     | Others                            | 1 (4.76)           | 0 (0.00)   | 1 (5.26)   |
| Do you consider sodium hypochlorite to be a good disinfectant?                                                                                                                                      | Yes                               | 88 (86.24) (89.80) | 58 (79.45) | 63 (85.14) |
|                                                                                                                                                                                                     | No                                | 4 (3.92) (4.08)    | 2 (2.74)   | 2 (2.70)   |
|                                                                                                                                                                                                     | Do not know                       | 6 (5.88) (6.12)    | 13 (17.81) | 9 (12.16)  |
| Did you know that sodium hypochlorite (0.1% to 0.5%) is effective for the inactivation of the new coronavirus and is recommended by the WHO for the disinfection of home and hospital environments? | Yes                               | 83 (81.34) (84.69) | 61 (83.56) | 66 (89.19) |
|                                                                                                                                                                                                     | No                                | 15 (14.70) (15.31) | 12 (16.44) | 8 (10.81)  |
| Did you know that the disinfectant solution used in the chamber for PPE disinfection is sodium hypochlorite solution?                                                                               | Yes                               | 91 (92.86)         | 58 (79.45) | 72 (97.30) |
|                                                                                                                                                                                                     | No                                | 7 (7.14)           | 15 (20.55) | 2 (7.70)   |
| Did you experience any discomfort when using the disinfection chamber?                                                                                                                              | Yes                               | 16 (16.33)         | 9 (12.33)  | 12 (16.22) |
|                                                                                                                                                                                                     | No                                | 82 (83.67)         | 64 (87.67) | 62 (83.78) |
| If yes to the previous question, please indicate the type of discomfort(s) you felt.                                                                                                                | Claustrophobia                    | 0 (0.00)           | 0 (0.00)   | 0 (0.00)   |
|                                                                                                                                                                                                     | Dizziness                         | 2 (5.88)           | 2 (12.50)  | 0 (0.00)   |
|                                                                                                                                                                                                     | Difficulty breathing              | 7 (20.59))         | 2 (12.50)  | 2 (8.33)   |
|                                                                                                                                                                                                     | Headache                          | 5 (14.71)          | 2 (12.50)  | 5 (20.83)  |
|                                                                                                                                                                                                     | Skin irritation                   | 4 (11.76))         | 4 (25.00)  | 5 (20.83)  |
|                                                                                                                                                                                                     | Irritation in the eyes            | 7 (20.59))         | 2 (12.5)   | 10 (41.67) |
|                                                                                                                                                                                                     | Throat irritation                 | 8 (23.53))         | 4 (25.00)  | 2 (8.33)   |
|                                                                                                                                                                                                     | Others                            | 1 (2.94)           | 0 (0.00)   | 0 (0.00)   |
| If your response was "YES" to the previous question, please specify the degree of irritation.                                                                                                       | Mild                              | 7 (43.75)          | 1 (14.29)  | 4 (33.33)  |
|                                                                                                                                                                                                     | Moderate                          | 8 (50.00)          | 6 (85.71)  | 8 (66.67)  |
|                                                                                                                                                                                                     | Severe                            | 1 (6.25)           | 0 (0.00)   | 0 (0.00)   |
| Did you know that the chamber was developed to reduce the microbial load, including that of the new coronavirus, on the surface of PPE?                                                             | Yes                               | 93 (94.90)         | 69 (94.52) | 74 (100)   |
|                                                                                                                                                                                                     | No                                | 5 (5.10)           | 4 (5.48)   | 0 (0.00)   |
| Do you consider the use of the disinfection chamber before the PPE doffing process as a safe option?                                                                                                | Yes                               | 75 (76.53)         | 37 (50.68) | 56 (75.68) |
|                                                                                                                                                                                                     | No                                | 7 (7.14)           | 7 (9.59)   | 5 (6.76)   |

|                                                                                                                            |             |            |            |            |
|----------------------------------------------------------------------------------------------------------------------------|-------------|------------|------------|------------|
|                                                                                                                            | Do not know | 16 (16.33) | 29 (39.73) | 13 (17.57) |
| Did you notice whether all PPE were uniformly humidified after using the chamber?                                          | Yes         | 62 (63.27) | 26 (35.62) | 38 (51.35) |
|                                                                                                                            | No          | 21 (21.43) | 12 (16.44) | 24 (32.43) |
|                                                                                                                            | Do not know | 15 (15.31) | 35 (47.95) | 12 (16.22) |
| Do you consider the disinfection chamber to be effective as an additional protective barrier for healthcare professionals? | Yes         | 77 (78.57) | 47 (64.38) | 60 (81.08) |
|                                                                                                                            | No          | 9 (9.18)   | 5 (6.85)   | 4 (5.41)   |
|                                                                                                                            | Do not know | 12 (12.24) | 21 (28.77) | 10 (13.51) |
| Do you consider that the use of the disinfection chamber can lead to a false sense of security?                            | Yes         | 30 (30.61) | 24 (32.88) | 25 (37.78) |
|                                                                                                                            | No          | 52 (53.06) | 28 (38.36) | 36 (48.65) |
|                                                                                                                            | Do not know | 16 (16.33) | 21 (28.77) | 13 (17.57) |
| Did you know that even with the use of the chamber all the procedures for the doffing of PPEs must be strictly followed?   | Yes         | 97 (98.98) | 70 (95.89) | 72 (97.30) |
|                                                                                                                            | No          | 1 (1.02)   | 3 (4.11)   | 2 (2.70)   |
| After using the chamber have you followed all the appropriate PPE doffing procedures?                                      | Yes         | 92 (93.88) | 47 (64.38) | 74 (100)   |
|                                                                                                                            | No          | 0 (0.00)   | 2 (2.74)   | 0 (0.00)   |
|                                                                                                                            | Do not know | 6 (6.12)   | 24 (32.88) | 0 (0.00)   |
